# Supplementary material for: Changes in serotype prevalence of Streptococcus pneumoniae in Southampton, UK between 2006 and 2018
Source: PubMed Central journal article supplement (PMC9349173; doi:10.1038/s41598-022-17600-6), 2022-08-03
Supplement: 41598_2022_17600_MOESM2_ESM.pdf [file 41598_2022_17600_MOESM2_ESM.pdf]

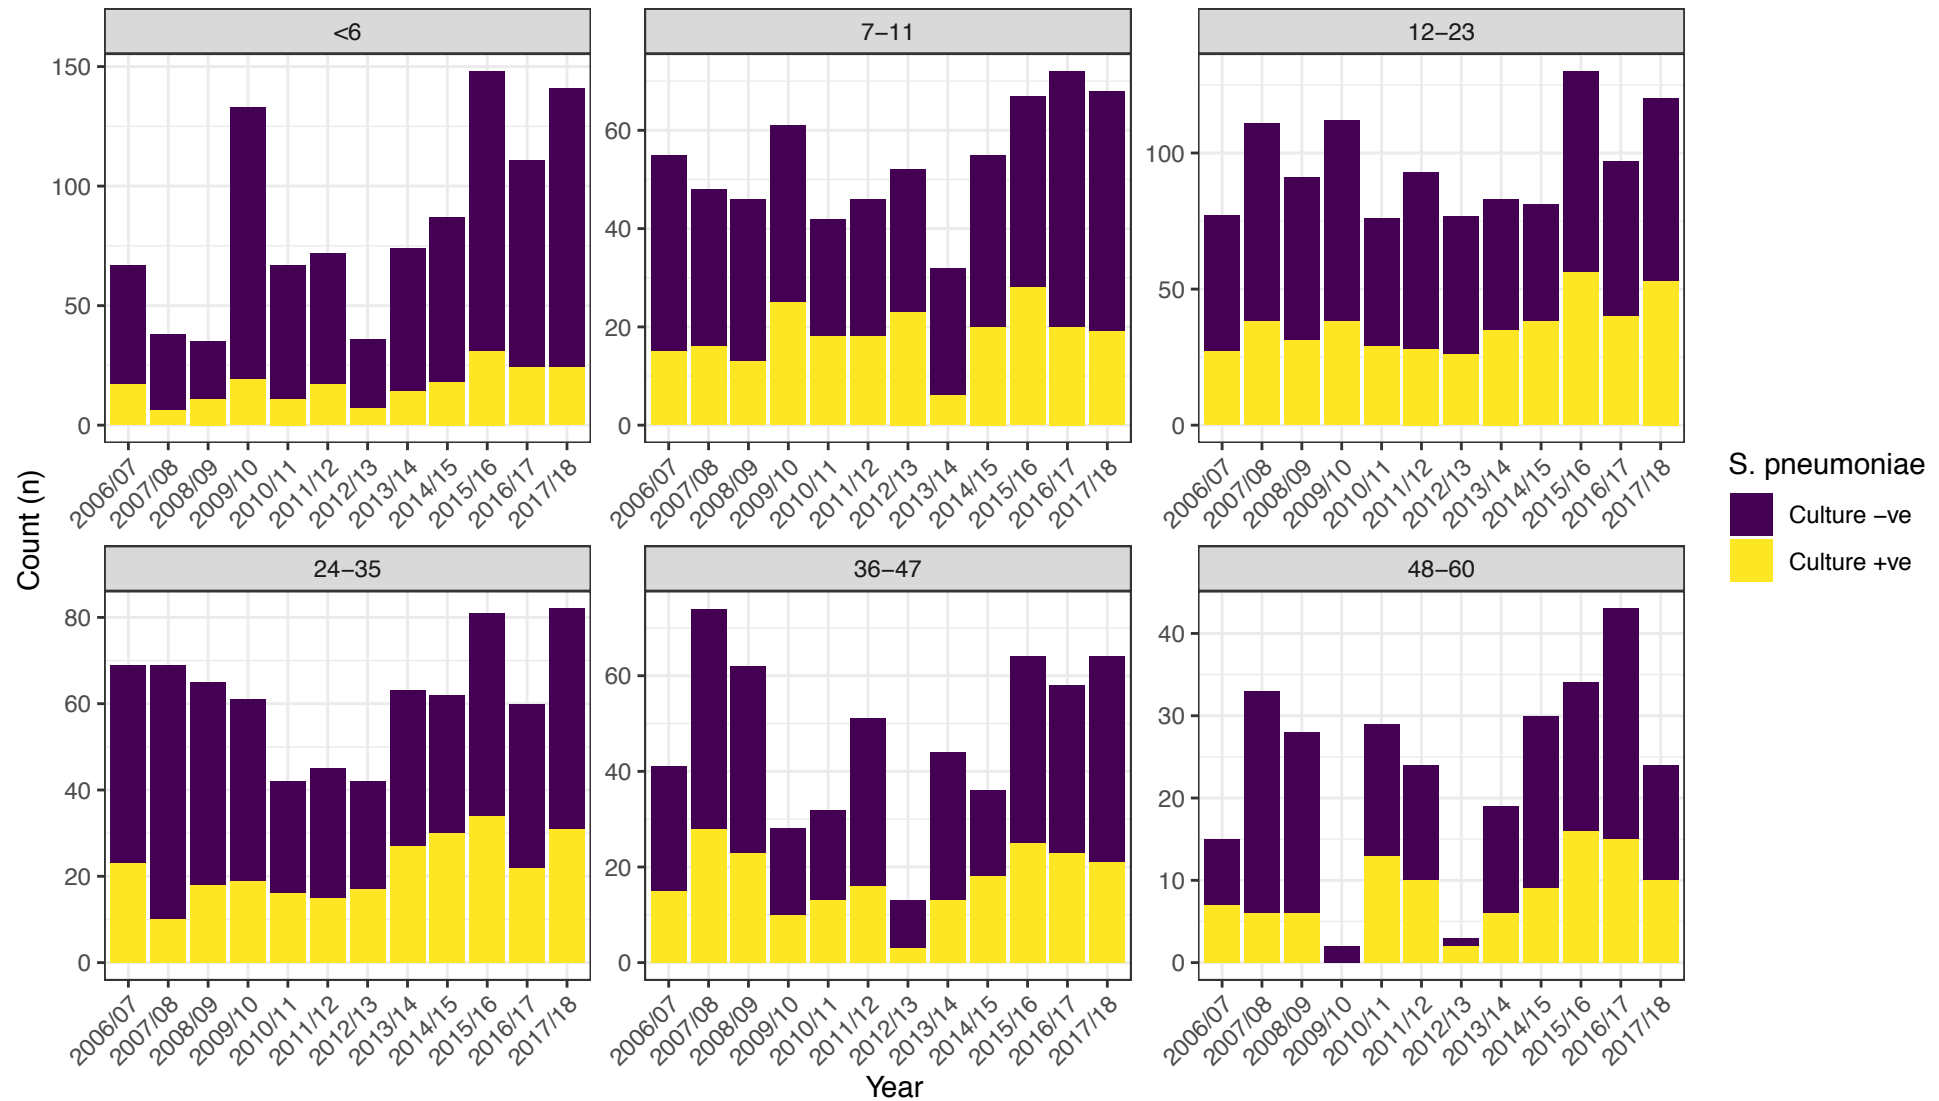

Supplementary Figure 1: Carriage by age and year of study. The number of children who carried pneumococci are shown in yellow and those that did not in purple.
